# Supplementary material
Source: MDPI journal article supplement (https://www.mdpi.com/2076-3417/12/19/10060)
Supplement: s1 [file s1]

# Supplementary Materials: Sustainable Manufacturing Decisions through the Optimization of Printing Parameters in 3D Printing

Cheng-Jung Yang and Sin-Syuan Wu

Table S1. Analysis of variance— $\triangle W$ .

| Source | DF | Adj SS | Adj MS | F-Value | P-Value | Contribution |
|--------|----|--------|--------|---------|---------|--------------|
| A      | 1  | 8.477  | 8.477  | 6.2     | 0.038   | 9.76%        |
| B      | 2  | 6.737  | 3.369  | 2.46    | 0.147   | 7.76%        |
| C      | 2  | 9.469  | 4.735  | 3.46    | 0.083   | 10.90%       |
| D      | 2  | 5.355  | 2.678  | 1.96    | 0.203   | 6.17%        |
| E      | 2  | 45.854 | 22.927 | 16.76   | 0.001   | 52.81%       |
| Error  | 8  | 10.941 | 1.368  |         |         | 12.60%       |
| Total  | 17 | 86.834 |        |         |         | 100.00%      |

Table S2. Analysis of variance— $\triangle OW$ .

| Source | DF | Adj SS | Adj MS | F-Value | P-Value | Contribution |
|--------|----|--------|--------|---------|---------|--------------|
| A      | 1  | 6.643  | 6.643  | 3.82    | 0.086   | 13.96%       |
| B      | 2  | 7.166  | 3.583  | 2.06    | 0.19    | 15.06%       |
| C      | 2  | 6.757  | 3.379  | 1.94    | 0.205   | 14.20%       |
| D      | 2  | 3.449  | 1.724  | 0.99    | 0.412   | 7.25%        |
| E      | 2  | 9.668  | 4.834  | 2.78    | 0.121   | 20.32%       |
| Error  | 8  | 13.898 | 1.737  |         |         | 29.21%       |
| Total  | 17 | 47.582 |        |         |         | 100.00%      |

Table S3. Analysis of variance— $\triangle OL$ .

| Source | DF | Adj SS | Adj MS | F-Value | P-Value | Contribution |
|--------|----|--------|--------|---------|---------|--------------|
| A      | 1  | 7.368  | 7.3685 | 5.21    | 0.052   | 19.35%       |
| B      | 2  | 6.269  | 3.1347 | 2.22    | 0.172   | 16.47%       |
| C      | 2  | 4.912  | 2.4562 | 1.74    | 0.237   | 12.90%       |
| D      | 2  | 6.717  | 3.3587 | 2.37    | 0.155   | 17.64%       |
| E      | 2  | 1.487  | 0.7434 | 0.53    | 0.61    | 3.91%        |
| Error  | 8  | 11.32  | 1.415  |         |         | 29.73%       |
| Total  | 17 | 38.074 |        |         |         | 100.00%      |

Table S4. Analysis of variance— $\Delta T$ .

| Source | DF | Adj SS | Adj MS  | F-Value | P-Value | Contribution |
|--------|----|--------|---------|---------|---------|--------------|
| A      | 1  | 0.63   | 0.6297  | 0.03    | 0.862   | 0.18%        |
| B      | 2  | 28.202 | 14.1009 | 0.72    | 0.515   | 8.15%        |
| C      | 2  | 44.091 | 22.0453 | 1.13    | 0.37    | 12.74%       |
| D      | 2  | 35.234 | 17.6172 | 0.9     | 0.443   | 10.18%       |
| E      | 2  | 81.764 | 40.8819 | 2.09    | 0.186   | 23.63%       |
| Error  | 8  | 156.14 | 19.5175 |         |         | 45.12%       |
| Total  | 17 | 346.06 |         |         |         | 100.00%      |

Table S5. Analysis of variance—CO<sub>2e</sub>.

| Source | DF | Adj SS  | Adj MS | F-Value | P-Value | Contribution |
|--------|----|---------|--------|---------|---------|--------------|
| A      | 1  | 3.066   | 3.066  | 2.23    | 0.174   | 0.69%        |
| B      | 2  | 4.408   | 2.204  | 1.6     | 0.259   | 0.99%        |
| C      | 2  | 1.078   | 0.539  | 0.39    | 0.688   | 0.24%        |
| D      | 2  | 285.04  | 142.52 | 103.75  | 0       | 63.95%       |
| E      | 2  | 141.134 | 70.567 | 51.37   | 0       | 31.66%       |
| Error  | 8  | 10.989  | 1.374  |         |         | 2.47%        |
| Total  | 17 | 445.715 |        |         |         | 100.00%      |

Table S6. Analysis of variance—material cost.

| Source | DF | Adj SS   | Adj MS   | F-Value | P-Value | Contribution |
|--------|----|----------|----------|---------|---------|--------------|
| A      | 1  | 0.009402 | 0.009402 | 4       | 0.081   | 7.14%        |
| B      | 2  | 0.004701 | 0.00235  | 1       | 0.41    | 3.57%        |
| C      | 2  | 0.004701 | 0.00235  | 1       | 0.41    | 3.57%        |
| D      | 2  | 0.018803 | 0.009402 | 4       | 0.062   | 14.29%       |
| E      | 2  | 0.075213 | 0.037606 | 16      | 0.002   | 57.14%       |
| Error  | 8  | 0.018803 | 0.00235  |         |         | 14.29%       |
| Total  | 17 | 0.131622 |          |         |         | 100.00%      |

Table S7. Analysis of variance—labor cost.

| Source | DF | Adj SS  | Adj MS  | F-Value | P-Value | Contribution |
|--------|----|---------|---------|---------|---------|--------------|
| A      | 1  | 10.911  | 10.911  | 6.67    | 0.032   | 2.02%        |
| B      | 2  | 24.918  | 12.459  | 7.62    | 0.014   | 4.62%        |
| C      | 2  | 2.657   | 1.329   | 0.81    | 0.477   | 0.49%        |
| D      | 2  | 15.156  | 7.578   | 4.64    | 0.046   | 2.81%        |
| E      | 2  | 473.032 | 236.516 | 144.68  | 0       | 87.64%       |
| Error  | 8  | 13.078  | 1.635   |         |         | 2.42%        |
| Total  | 17 | 539.752 |         |         |         | 100.00%      |

Table S8. Analysis of variance—electricity cost.

| Source | DF | Adj SS  | Adj MS | F-Value | P-Value | Contribution |
|--------|----|---------|--------|---------|---------|--------------|
| A      | 1  | 3.066   | 3.066  | 2.23    | 0.174   | 0.69%        |
| B      | 2  | 4.408   | 2.204  | 1.6     | 0.259   | 0.99%        |
| C      | 2  | 1.078   | 0.539  | 0.39    | 0.688   | 0.24%        |
| D      | 2  | 285.04  | 142.52 | 103.75  | 0       | 63.95%       |
| E      | 2  | 141.134 | 70.567 | 51.37   | 0       | 31.66%       |
| Error  | 8  | 10.989  | 1.374  |         |         | 2.47%        |
| Total  | 17 | 445.715 |        |         |         | 100.00%      |

A: Fan rate (%).

B: Print speed (mm/s).

C: Nozzle temperature (°C).

D: Build plate temperature (°C).

E: Layer thickness (mm).
